# Supplementary material
Source: publisher figshare collection journal article supplement (https://karger.figshare.com/articles/dataset/_/24550819)
Supplement: Supplementary file 1 [file 1]

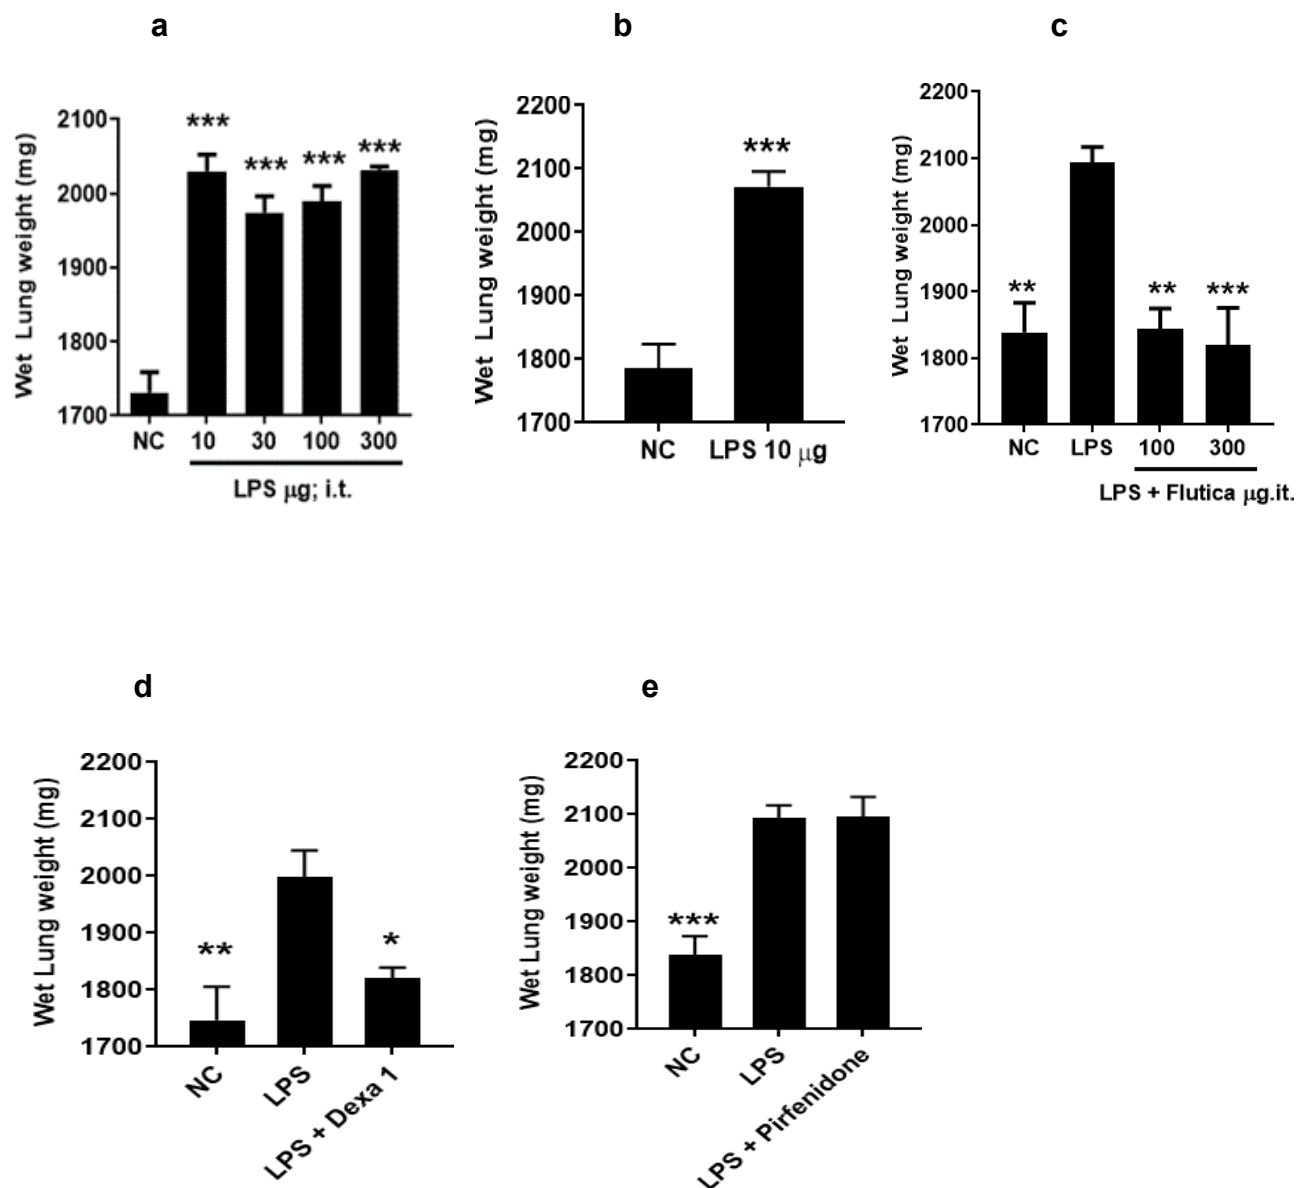

**Supplemental Fig 1.** Effect of LPS concentrations (a, b), Fluticasone, i.t. (c), Dexamethasone, p.o. (d), and pirfenidone, i.t. (e) treatment on lung weight in rats (4 hr). N=5-7/group. \*p <0.05; \*\*p<0.01; and \*\*\*p<0.001 Vs LPS by one-way ANOVA followed by Dunnett's test for multiple comparison test.
