# Supplementary material
Source: publisher figshare collection journal article supplement (https://karger.figshare.com/articles/dataset/_/24550819)
Supplement: Supplementary file 2 [file 1]

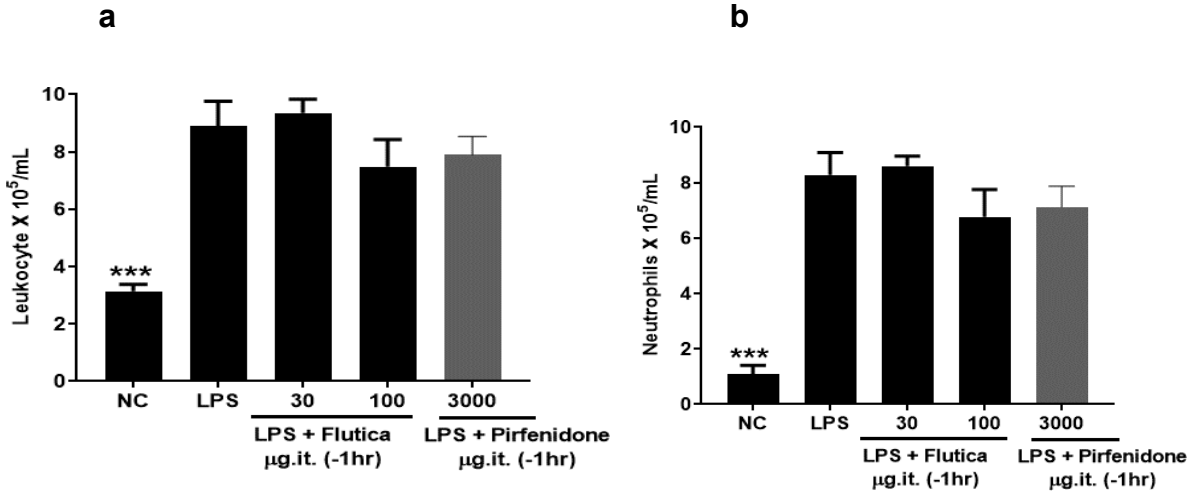

**Supplemental Fig 2. Intratracheal Fluticasone and Pirfenidone treatment at (-1 hr) failed to inhibit pulmonary inflammation in rat LPS model (4 hr).** Effect of 30 and 100 µg i.t. Fluticasone (Flutica) and 3000 µg i.t. Pirfenidone treatment on (a) Leukocytes, (b) Neutrophils given -1 hr prior to LPS challenge. \*\*\*P<0.001 Vs LPS by one-way ANOVA followed by Dunnett's multiple comparison test. N=4/group.
